# Supplementary material
Source: Springer Nature journal article supplement (https://www.springermedizin.de/resource/supplementary/12889_2011_4397_MOESM2_ESM.pdf/9492428)
Supplement: MOESM2 [file 9492428]

**Step 1 Categories generated:**

Programme aims      Funding body      Health aims      Walking aims  
Recruitment method selection      Target population

**Step 2 Category relationships:**

Funding body      —> Programme aims  
Programme aims      —> Recruitment method selection

**Step 3 Working typology and summary:**

Recruitment method selection is driven by programme aims

**Step 4 Subsequent case analysis enables redefinition:**

Programmes with health aims      —>      targeted recruitment  
Programmes with walking aims      —>      no targeted recruitment

New working typology and summary

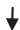

Programmes with health aims use more targeted recruitment than those with other aims

**Step 5 Negative cases modify previous summary**

Programme with walking aims for 20s -30s age range **does** use targeted methods.

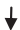

Previous summary needs modification

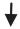

Programme aims which require targeting of specific groups adopt more specific recruitment methods
